# Supplementary material
Source: PubMed Central journal article supplement (PMC7036711)
Supplement: mmc1.pdf [file mmc1.pdf]

**Biophysical Journal, Volume 118**

**Supplemental Information**

**DHHC20 Palmitoyl-Transferase Reshapes the Membrane to Foster  
Catalysis**

**Robyn Stix, James Song, Anirban Banerjee, and José D. Faraldo-Gómez**

## Palmitoyl-CoA topology

read rtf card append

\* Stix, Song, Banerjee & Faraldo-Gómez

\* Biophysical Journal 2020

\*

36 1

RESI PCA -4.00

GROUP

|                     |              |
|---------------------|--------------|
| ATOM CG CT3 -0.27 ! | HG3          |
| ATOM HG1 HA3 0.09 ! |              |
| ATOM HG2 HA3 0.09 ! | HG2--CG--HG1 |
| ATOM HG3 HA3 0.09 ! |              |

GROUP

|                     |              |
|---------------------|--------------|
| ATOM CF CT2 -0.18 ! | HF2--CF--HF1 |
| ATOM HF1 HA2 0.09 ! |              |
| ATOM HF2 HA2 0.09   |              |

GROUP

|                     |              |
|---------------------|--------------|
| ATOM CE CT2 -0.18 ! | HE2--CE--HE1 |
| ATOM HE1 HA2 0.09 ! |              |
| ATOM HE2 HA2 0.09   |              |

GROUP

|                     |              |
|---------------------|--------------|
| ATOM CD CT2 -0.18 ! | HD2--CD--HD1 |
| ATOM HD1 HA2 0.09 ! |              |
| ATOM HD2 HA2 0.09   |              |

GROUP

|                     |              |
|---------------------|--------------|
| ATOM CC CT2 -0.18 ! | HC2--CC--HC1 |
| ATOM HC1 HA2 0.09 ! |              |
| ATOM HC2 HA2 0.09   |              |

GROUP

|                     |              |
|---------------------|--------------|
| ATOM CB CT2 -0.18 ! | HB2--CB--HB1 |
| ATOM HB1 HA2 0.09 ! |              |
| ATOM HB2 HA2 0.09   |              |

GROUP

|                     |              |
|---------------------|--------------|
| ATOM CA CT2 -0.18 ! | HA2--CA--HA1 |
| ATOM HA1 HA2 0.09 ! |              |
| ATOM HA2 HA2 0.09   |              |

GROUP  
ATOM C9 CT2 -0.18 ! H92--C9--H91  
ATOM H91 HA2 0.09 ! |  
ATOM H92 HA2 0.09

GROUP  
ATOM C8 CT2 -0.18 ! H82--C8--H81  
ATOM H81 HA2 0.09 ! |  
ATOM H82 HA2 0.09

GROUP  
ATOM C7 CT2 -0.18 ! H72--C7--H71  
ATOM H71 HA2 0.09 ! |  
ATOM H72 HA2 0.09

GROUP  
ATOM C6 CT2 -0.18 ! H62--C6--H61  
ATOM H61 HA2 0.09 ! |  
ATOM H62 HA2 0.09

GROUP  
ATOM C5 CT2 -0.18 ! H51--C5--H52  
ATOM H51 HA2 0.09 ! |  
ATOM H52 HA2 0.09

GROUP  
ATOM C4 CT2 -0.18 ! H42--C4--H41  
ATOM H41 HA2 0.09 ! |  
ATOM H42 HA2 0.09

GROUP  
ATOM C3 CT2 -0.18 ! H32--C3--H31  
ATOM H31 HA2 0.09 ! |  
ATOM H32 HA2 0.09

GROUP  
ATOM C2 CT2 -0.18 ! H2 --C2--H1 H21  
ATOM H1 HA2 0.09 ! | |  
ATOM H2 HA2 0.09 ! C1--S1P--C2P--  
ATOM C1 C 0.44 ! // |  
ATOM O2 O -0.39 ! O2 H22  
ATOM S1P S -0.09  
ATOM C2P CT2 -0.14  
ATOM H21 HA2 0.09  
ATOM H22 HA2 0.09

GROUP  
ATOM C3P CT2 -0.02 ! H3X O5P H6X  
ATOM H3X HA2 0.09 ! | || |  
ATOM H3Y HA2 0.09 !--C3P--N4P--C5P--C6P--  
ATOM N4P NH1 -0.47 ! | | |  
ATOM HN4 H 0.31 ! H3Y HN4 H6Y

GROUP  
ATOM C5P C 0.51  
ATOM O5P O -0.51

GROUP  
ATOM C6P CT2 -0.18  
ATOM H6X HA2 0.09  
ATOM H6Y HA2 0.09

GROUP  
ATOM C7P CT2 -0.02 ! H7X O9P  
ATOM H7X HA2 0.09 ! | ||  
ATOM H7Y HA2 0.09 !--C7P--N8P--C9P--  
ATOM N8P NH1 -0.47 ! | | |  
ATOM HN8 H 0.31 ! H7Y HN8

GROUP  
ATOM C9P C 0.51  
ATOM O9P O -0.51

GROUP  
ATOM CAP CT1 0.14 ! H10 CEP(H3)  
ATOM OAP OH1 -0.66 ! | |  
ATOM HO1 H 0.43 !--CAP--CBP  
ATOM H10 HA1 0.09 ! | |  
! OAP CDP(H3)

GROUP  
ATOM CBP CT1 0.00 ! HO1

GROUP  
ATOM CEP CT3 -0.27  
ATOM H141 HA3 0.09  
ATOM H142 HA3 0.09  
ATOM H143 HA3 0.09

GROUP  
ATOM CDP CT3 -0.27  
ATOM H131 HA3 0.09  
ATOM H132 HA3 0.09

ATOM H133 HA3 0.09

GROUP

ATOM CCP CG321 -0.08 ! H121 05A  
ATOM H121 HGA2 0.09 ! | |  
ATOM H122 HGA2 0.09 ! --CCP--O6A--P2A--O3A  
ATOM O6A OG303 -0.62 ! | |  
ATOM P2A PG1 1.46 ! H122 04A  
ATOM O5A OG2P1 -0.83 !  
ATOM O4A OG2P1 -0.83 !  
ATOM O3A OG304 -0.63 !

GROUP

ATOM P1A PG1 1.50 ! H61A H62A  
ATOM O1A OG2P1 -0.82 ! \ /  
ATOM O2A OG2P1 -0.82 ! N6A  
ATOM O5B OG303 -0.61 ! |  
ATOM C5B CG321 -0.08 ! C6A  
ATOM H51A HGA2 0.09 ! // \  
ATOM H52A HGA2 0.09 ! N1A C5A--N7A

! | || \\  
GROUP ! | || C8A--H8A

ATOM C4B CG3C51 0.16 ! | || /  
ATOM H4B HGA1 0.09 ! C2A C4A--N9A  
ATOM O4B OG3C51 -0.50 ! /\ / \  
ATOM C1B CG3C51 0.16 ! H2A N3A \  
ATOM H1B HGA1 0.09 ! \

GROUP

! \\  
ATOM N9A NG2R51 -0.05 ! \  
ATOM C5A CG2RC0 0.28 ! O1A H51A H4B 04B \  
ATOM N7A NG2R50 -0.71 ! | \ / \  
ATOM C8A CG2R53 0.34 ! -P1A--O5B--C5B--C4B C1B  
ATOM H8A HGR52 0.12 ! | \ / \  
ATOM N1A NG2R62 -0.74 ! O2A H52A C3B--C2B H1B  
ATOM C2A CG2R64 0.50 ! / \ / \  
ATOM H2A HGR62 0.13 ! 03B H3B 02B H2B  
ATOM N3A NG2R62 -0.75 ! | |  
ATOM C4A CG2RC0 0.43 ! O8A--P3B--O7A H02A  
ATOM C6A CG2R64 0.46 ! |  
ATOM N6A NG2S3 -0.77 ! O9A  
ATOM H61A HGP4 0.38  
ATOM H62A HGP4 0.38

GROUP

ATOM C2B CG3C51 0.14

|           |       |       |
|-----------|-------|-------|
| ATOM H2B  | HGA1  | 0.09  |
| ATOM O2B  | OG311 | -0.66 |
| ATOM HO2A | HGP1  | 0.43  |

GROUP

|          |        |       |
|----------|--------|-------|
| ATOM C3B | CG3C51 | -0.09 |
| ATOM H3B | HGA1   | 0.09  |
| ATOM P3B | PG2    | 1.10  |
| ATOM O7A | OG2P1  | -0.90 |
| ATOM O8A | OG2P1  | -0.90 |
| ATOM O3B | OG303  | -0.40 |
| ATOM O9A | OG2P1  | -0.90 |

|      |     |      |     |      |     |      |
|------|-----|------|-----|------|-----|------|
| BOND | CG  | HG1  | CG  | HG2  | CG  | HG3  |
| BOND | CF  | CG   | CF  | HF1  | CF  | HF2  |
| BOND | CE  | CF   | CE  | HE1  | CE  | HE2  |
| BOND | CD  | CE   | CD  | HD1  | CD  | HD2  |
| BOND | CC  | CD   | CC  | HC1  | CC  | HC2  |
| BOND | CB  | CC   | CB  | HB1  | CB  | HB2  |
| BOND | CA  | CB   | CA  | HA1  | CA  | HA2  |
| BOND | C9  | CA   | C9  | H91  | C9  | H92  |
| BOND | C8  | C9   | C8  | H81  | C8  | H82  |
| BOND | C7  | C8   | C7  | H71  | C7  | H72  |
| BOND | C6  | C7   | C6  | H61  | C6  | H62  |
| BOND | C5  | C6   | C5  | H51  | C5  | H52  |
| BOND | C4  | C5   | C4  | H41  | C4  | H42  |
| BOND | C3  | C4   | C3  | H31  | C3  | H32  |
| BOND | C2  | H1   | C2  | H2   | C2  | C3   |
| BOND | C2  | C1   | C1  | O2   | S1P | C1   |
| BOND | C2P | S1P  | C2P | H21  | C2P | H22  |
| BOND | C2P | C3P  |     |      |     |      |
| BOND | C3P | H3X  | C3P | H3Y  | C3P | N4P  |
| BOND | N4P | HN4  | N4P | C5P  |     |      |
| BOND | C5P | O5P  | C5P | C6P  |     |      |
| BOND | C6P | H6X  | C6P | H6Y  |     |      |
| BOND | C6P | C7P  |     |      |     |      |
| BOND | C7P | H7X  | C7P | H7Y  | C7P | N8P  |
| BOND | N8P | HN8  | N8P | C9P  |     |      |
| BOND | C9P | O9P  |     |      |     |      |
| BOND | C9P | CAP  |     |      |     |      |
| BOND | CAP | OAP  | CAP | H10  | CAP | CBP  |
| BOND | CBP | CDP  | CBP | CEP  |     |      |
| BOND | CDP | H131 | CDP | H132 | CDP | H133 |
| BOND | CEP | H141 | CEP | H142 | CEP | H143 |
| BOND | CBP | CCP  |     |      |     |      |
| BOND | P1A | O3A  | O3A | P2A  |     |      |

BOND P2A O5A P2A O4A P2A O6A  
BOND O6A CCP CCP H121 CCP H122  
BOND P1A O1A P1A O2A P1A O5B  
BOND O5B C5B C5B C4B C4B O4B C4B C3B O4B C1B  
BOND C1B N9A C1B C2B N9A C4A N9A C8A C4A N3A  
BOND C2A N1A C6A N6A  
BOND N6A H61A N6A H62A C6A C5A C5A N7A  
BOND C2B C3B C2B O2B O2B HO2A C3B O3B  
BOND C1B H1B C2B H2B C3B H3B C4B H4B C5B H51A  
BOND C5B H52A C8A H8A C2A H2A  
DOUBLE N1A C6A C2A N3A C4A C5A N7A C8A  
BOND O3B P3B P3B O7A P3B O8A P3B O9A

IMPR C1 S1P C2 O2  
IMPR N4P C5P C3P HN4  
IMPR C5P C6P N4P O5P  
IMPR N8P C9P C7P HN8  
IMPR C9P CAP N8P O9P  
IMPR N6A H61A H62A C6A  
IMPR C6A C5A N1A N6A

END  
RETURN

## Caprylic-CoA topology

read rtf card append

\* Stix, Song, Banerjee & Faraldo-Gómez

\* Biophysical Journal 2020

\*

36 1

RESI CCOA -4.00

GROUP

ATOM C8 CT3 -0.27

ATOM H81 HA3 0.09

ATOM H82 HA3 0.09

ATOM H83 HA3 0.09

GROUP

ATOM C7 CT2 -0.18

ATOM H71 HA2 0.09

ATOM H72 HA2 0.09

GROUP

ATOM C6 CT2 -0.18

ATOM H61 HA2 0.09

ATOM H62 HA2 0.09

GROUP

ATOM C5 CT2 -0.18

ATOM H51 HA2 0.09

ATOM H52 HA2 0.09

GROUP

ATOM C4 CT2 -0.18

ATOM H41 HA2 0.09

ATOM H42 HA2 0.09

GROUP

ATOM C3 CT2 -0.18

ATOM H31 HA2 0.09

ATOM H32 HA2 0.09

GROUP

ATOM C2 CT2 -0.18

ATOM H1 HA2 0.09

ATOM H2 HA2 0.09

ATOM C1 C 0.44



|          |     |       |
|----------|-----|-------|
| ATOM O2  | O   | -0.39 |
| ATOM S1P | S   | -0.09 |
| ATOM C2P | CT2 | -0.14 |
| ATOM H21 | HA2 | 0.09  |
| ATOM H22 | HA2 | 0.09  |

GROUP

|          |     |       |
|----------|-----|-------|
| ATOM C3P | CT2 | -0.02 |
| ATOM H3X | HA2 | 0.09  |
| ATOM H3Y | HA2 | 0.09  |
| ATOM N4P | NH1 | -0.47 |
| ATOM HN4 | H   | 0.31  |

GROUP

|          |   |       |
|----------|---|-------|
| ATOM C5P | C | 0.51  |
| ATOM O5P | O | -0.51 |

GROUP

|          |     |       |
|----------|-----|-------|
| ATOM C6P | CT2 | -0.18 |
| ATOM H6X | HA2 | 0.09  |
| ATOM H6Y | HA2 | 0.09  |

GROUP

|          |     |       |
|----------|-----|-------|
| ATOM C7P | CT2 | -0.02 |
| ATOM H7X | HA2 | 0.09  |
| ATOM H7Y | HA2 | 0.09  |
| ATOM N8P | NH1 | -0.47 |
| ATOM HN8 | H   | 0.31  |

GROUP

|          |   |       |
|----------|---|-------|
| ATOM C9P | C | 0.51  |
| ATOM O9P | O | -0.51 |

GROUP

|          |     |       |
|----------|-----|-------|
| ATOM CAP | CT1 | 0.14  |
| ATOM OAP | OH1 | -0.66 |
| ATOM HO1 | H   | 0.43  |
| ATOM H10 | HA1 | 0.09  |

GROUP

|          |     |      |
|----------|-----|------|
| ATOM CBP | CT1 | 0.00 |
|----------|-----|------|

GROUP

|           |     |       |
|-----------|-----|-------|
| ATOM CEP  | CT3 | -0.27 |
| ATOM H141 | HA3 | 0.09  |
| ATOM H142 | HA3 | 0.09  |

ATOM H143 HA3 0.09

GROUP

ATOM CDP CT3 -0.27  
ATOM H131 HA3 0.09  
ATOM H132 HA3 0.09  
ATOM H133 HA3 0.09

GROUP

ATOM CCP CG321 -0.08  
ATOM H121 HGA2 0.09  
ATOM H122 HGA2 0.09  
ATOM O6A OG303 -0.62  
ATOM P2A PG1 1.46  
ATOM O5A OG2P1 -0.83  
ATOM O4A OG2P1 -0.83  
ATOM O3A OG304 -0.63

GROUP

ATOM P1A PG1 1.50  
ATOM O1A OG2P1 -0.82  
ATOM O2A OG2P1 -0.82  
ATOM O5B OG303 -0.61  
ATOM C5B CG321 -0.08  
ATOM H51A HGA2 0.09  
ATOM H52A HGA2 0.09

GROUP

ATOM C4B CG3C51 0.16  
ATOM H4B HGA1 0.09  
ATOM O4B OG3C51 -0.50  
ATOM C1B CG3C51 0.16  
ATOM H1B HGA1 0.09

GROUP

ATOM N9A NG2R51 -0.05  
ATOM C5A CG2RC0 0.28  
ATOM N7A NG2R50 -0.71  
ATOM C8A CG2R53 0.34  
ATOM H8A HGR52 0.12  
ATOM N1A NG2R62 -0.74  
ATOM C2A CG2R64 0.50  
ATOM H2A HGR62 0.13  
ATOM N3A NG2R62 -0.75  
ATOM C4A CG2RC0 0.43  
ATOM C6A CG2R64 0.46

ATOM N6A NG2S3 -0.77  
ATOM H61A HGP4 0.38  
ATOM H62A HGP4 0.38

GROUP

ATOM C2B CG3C51 0.14  
ATOM H2B HGA1 0.09  
ATOM O2B OG311 -0.66  
ATOM HO2A HGP1 0.43

GROUP

ATOM C3B CG3C51 -0.09  
ATOM H3B HGA1 0.09  
ATOM P3B PG2 1.10  
ATOM O7A OG2P1 -0.90  
ATOM O8A OG2P1 -0.90  
ATOM O3B OG303 -0.40  
ATOM O9A OG2P1 -0.90

BOND C8 H83 C8 H81 C8 H82  
BOND C7 C8 C7 H71 C7 H72  
BOND C6 C7 C6 H61 C6 H62  
BOND C5 C6 C5 H51 C5 H52  
BOND C4 C5 C4 H41 C4 H42  
BOND C3 C4 C3 H31 C3 H32  
BOND C2 H1 C2 H2 C2 C3  
BOND C2 C1 C1 O2 S1P C1  
BOND C2P S1P C2P H21 C2P H22  
BOND C2P C3P  
BOND C3P H3X C3P H3Y C3P N4P  
BOND N4P HN4 N4P C5P  
BOND C5P O5P C5P C6P  
BOND C6P H6X C6P H6Y  
BOND C6P C7P  
BOND C7P H7X C7P H7Y C7P N8P  
BOND N8P HN8 N8P C9P  
BOND C9P O9P  
BOND C9P CAP  
BOND CAP OAP CAP H10 CAP CBP OAP HO1  
BOND CBP CDP CBP CEP  
BOND CDP H131 CDP H132 CDP H133  
BOND CEP H141 CEP H142 CEP H143  
BOND CBP CCP  
BOND P1A O3A O3A P2A  
BOND P2A O5A P2A O4A P2A O6A  
BOND O6A CCP CCP H121 CCP H122

BOND P1A O1A P1A O2A P1A O5B  
BOND O5B C5B C5B C4B C4B O4B C4B C3B O4B C1B  
BOND C1B N9A C1B C2B N9A C4A N9A C8A C4A N3A  
BOND C2A N1A C6A N6A  
BOND N6A H61A N6A H62A C6A C5A C5A N7A  
BOND C2B C3B C2B O2B O2B HO2A C3B O3B  
BOND C1B H1B C2B H2B C3B H3B C4B H4B C5B H51A  
BOND C5B H52A C8A H8A C2A H2A  
DOUBLE N1A C6A C2A N3A C4A C5A N7A C8A  
BOND O3B P3B P3B O7A P3B O8A P3B O9A  
IMPR C1 S1P C2 O2  
IMPR N4P C5P C3P HN4  
IMPR C5P C6P N4P O5P  
IMPR N8P C9P C7P HN8  
IMPR C9P CAP N8P O9P  
IMPR N6A H61A H62A C6A  
IMPR C6A C5A N1A N6A

## Behenic-CoA topology

read rtf card append

\* Stix, Song, Banerjee & Faraldo-Gómez

\* Biophysical Journal 2020

\*

36 1

RESI BCOA -4.00

GROUP

ATOM CM CT3 -0.27

ATOM HM1 HA3 0.09

ATOM HM2 HA3 0.09

ATOM HM3 HA3 0.09

GROUP

ATOM CL CT2 -0.18

ATOM HL1 HA2 0.09

ATOM HL2 HA2 0.09

GROUP

ATOM CK CT2 -0.18

ATOM HK1 HA2 0.09

ATOM HK2 HA2 0.09

GROUP

ATOM CJ CT2 -0.18

ATOM HJ1 HA2 0.09

ATOM HJ2 HA2 0.09

GROUP

ATOM CI CT2 -0.18

ATOM HI1 HA2 0.09

ATOM HI2 HA2 0.09

GROUP

ATOM CH CT2 -0.18

ATOM HH1 HA2 0.09

ATOM HH2 HA2 0.09

GROUP

ATOM CG CT2 -0.18

ATOM HG1 HA2 0.09

ATOM HG2 HA2 0.09

GROUP  
ATOM CF CT2 -0.18  
ATOM HF1 HA2 0.09  
ATOM HF2 HA2 0.09

GROUP  
ATOM CE CT2 -0.18  
ATOM HE1 HA2 0.09  
ATOM HE2 HA2 0.09

GROUP  
ATOM CD CT2 -0.18  
ATOM HD1 HA2 0.09  
ATOM HD2 HA2 0.09

GROUP  
ATOM CC CT2 -0.18  
ATOM HC1 HA2 0.09  
ATOM HC2 HA2 0.09

GROUP  
ATOM CB CT2 -0.18  
ATOM HB1 HA2 0.09  
ATOM HB2 HA2 0.09

GROUP  
ATOM CA CT2 -0.18  
ATOM HA1 HA2 0.09  
ATOM HA2 HA2 0.09

GROUP  
ATOM C9 CT2 -0.18  
ATOM H91 HA2 0.09  
ATOM H92 HA2 0.09

GROUP  
ATOM C8 CT2 -0.18  
ATOM H81 HA2 0.09  
ATOM H82 HA2 0.09

GROUP  
ATOM C7 CT2 -0.18  
ATOM H71 HA2 0.09  
ATOM H72 HA2 0.09

GROUP

ATOM C6 CT2 -0.18  
ATOM H61 HA2 0.09  
ATOM H62 HA2 0.09

GROUP

ATOM C5 CT2 -0.18  
ATOM H51 HA2 0.09  
ATOM H52 HA2 0.09

GROUP

ATOM C4 CT2 -0.18  
ATOM H41 HA2 0.09  
ATOM H42 HA2 0.09

GROUP

ATOM C3 CT2 -0.18  
ATOM H31 HA2 0.09  
ATOM H32 HA2 0.09

GROUP

ATOM C2 CT2 -0.18  
ATOM H1 HA2 0.09  
ATOM H2 HA2 0.09  
ATOM C1 C 0.44  
ATOM O2 O -0.39  
ATOM S1P S -0.09  
ATOM C2P CT2 -0.14  
ATOM H21 HA2 0.09  
ATOM H22 HA2 0.09

GROUP

ATOM C3P CT2 -0.02  
ATOM H3X HA2 0.09  
ATOM H3Y HA2 0.09  
ATOM N4P NH1 -0.47  
ATOM HN4 H 0.31

GROUP

ATOM C5P C 0.51  
ATOM O5P O -0.51

GROUP

ATOM C6P CT2 -0.18  
ATOM H6X HA2 0.09  
ATOM H6Y HA2 0.09

GROUP  
ATOM C7P CT2 -0.02  
ATOM H7X HA2 0.09  
ATOM H7Y HA2 0.09  
ATOM N8P NH1 -0.47  
ATOM HN8 H 0.31

GROUP  
ATOM C9P C 0.51  
ATOM O9P O -0.51

GROUP  
ATOM CAP CT1 0.14  
ATOM OAP OH1 -0.66  
ATOM HO1 H 0.43  
ATOM H10 HA1 0.09

GROUP  
ATOM CBP CT1 0.00

GROUP  
ATOM CEP CT3 -0.27  
ATOM H141 HA3 0.09  
ATOM H142 HA3 0.09  
ATOM H143 HA3 0.09

GROUP  
ATOM CDP CT3 -0.27  
ATOM H131 HA3 0.09  
ATOM H132 HA3 0.09  
ATOM H133 HA3 0.09

GROUP  
ATOM CCP CG321 -0.08  
ATOM H121 HGA2 0.09  
ATOM H122 HGA2 0.09  
ATOM O6A OG303 -0.62  
ATOM P2A PG1 1.46  
ATOM O5A OG2P1 -0.83  
ATOM O4A OG2P1 -0.83  
ATOM O3A OG304 -0.63

GROUP  
ATOM P1A PG1 1.50  
ATOM O1A OG2P1 -0.82



|           |       |       |
|-----------|-------|-------|
| ATOM O2A  | OG2P1 | -0.82 |
| ATOM O5B  | OG303 | -0.61 |
| ATOM C5B  | CG321 | -0.08 |
| ATOM H51A | HGA2  | 0.09  |
| ATOM H52A | HGA2  | 0.09  |

GROUP

|          |        |       |
|----------|--------|-------|
| ATOM C4B | CG3C51 | 0.16  |
| ATOM H4B | HGA1   | 0.09  |
| ATOM O4B | OG3C51 | -0.50 |
| ATOM C1B | CG3C51 | 0.16  |
| ATOM H1B | HGA1   | 0.09  |

GROUP

|           |        |       |
|-----------|--------|-------|
| ATOM N9A  | NG2R51 | -0.05 |
| ATOM C5A  | CG2RC0 | 0.28  |
| ATOM N7A  | NG2R50 | -0.71 |
| ATOM C8A  | CG2R53 | 0.34  |
| ATOM H8A  | HGR52  | 0.12  |
| ATOM N1A  | NG2R62 | -0.74 |
| ATOM C2A  | CG2R64 | 0.50  |
| ATOM H2A  | HGR62  | 0.13  |
| ATOM N3A  | NG2R62 | -0.75 |
| ATOM C4A  | CG2RC0 | 0.43  |
| ATOM C6A  | CG2R64 | 0.46  |
| ATOM N6A  | NG2S3  | -0.77 |
| ATOM H61A | HGP4   | 0.38  |
| ATOM H62A | HGP4   | 0.38  |

GROUP

|           |        |       |
|-----------|--------|-------|
| ATOM C2B  | CG3C51 | 0.14  |
| ATOM H2B  | HGA1   | 0.09  |
| ATOM O2B  | OG311  | -0.66 |
| ATOM HO2A | HGP1   | 0.43  |

GROUP

|          |        |       |
|----------|--------|-------|
| ATOM C3B | CG3C51 | -0.09 |
| ATOM H3B | HGA1   | 0.09  |
| ATOM P3B | PG2    | 1.10  |
| ATOM O7A | OG2P1  | -0.90 |
| ATOM O8A | OG2P1  | -0.90 |
| ATOM O3B | OG303  | -0.40 |
| ATOM O9A | OG2P1  | -0.90 |

|      |    |     |    |     |    |     |
|------|----|-----|----|-----|----|-----|
| BOND | CM | HM1 | CM | HM2 | CM | HM3 |
| BOND | CL | CM  | CL | HL1 | CL | HL2 |

BOND CK CL CK HK1 CK HK2  
BOND CJ CK CJ HJ1 CJ HJ2  
BOND CI CJ CI HI1 CI HI2  
BOND CH CI CH HH1 CH HH2  
BOND CG CH CG HG1 CG HG2  
BOND CF CG CF HF1 CF HF2  
BOND CE CF CE HE1 CE HE2  
BOND CD CE CD HD1 CD HD2  
BOND CC CD CC HC1 CC HC2  
BOND CB CC CB HB1 CB HB2  
BOND CA CB CA HA1 CA HA2  
BOND C9 CA C9 H91 C9 H92  
BOND C8 C9 C8 H81 C8 H82  
BOND C7 C8 C7 H71 C7 H72  
BOND C6 C7 C6 H61 C6 H62  
BOND C5 C6 C5 H51 C5 H52  
BOND C4 C5 C4 H41 C4 H42  
BOND C3 C4 C3 H31 C3 H32  
BOND C2 H1 C2 H2 C2 C3  
BOND C2 C1 C1 O2 S1P C1  
BOND C2P S1P C2P H21 C2P H22  
BOND C2P C3P  
BOND C3P H3X C3P H3Y C3P N4P  
BOND N4P HN4 N4P C5P  
BOND C5P O5P C5P C6P  
BOND C6P H6X C6P H6Y  
BOND C6P C7P  
BOND C7P H7X C7P H7Y C7P N8P  
BOND N8P HN8 N8P C9P  
BOND C9P O9P  
BOND C9P CAP  
BOND CAP OAP CAP H10 CAP CBP OAP HO1  
BOND CBP CDP CBP CEP  
BOND CDP H131 CDP H132 CDP H133  
BOND CEP H141 CEP H142 CEP H143  
BOND CBP CCP  
BOND P1A O3A O3A P2A  
BOND P2A O5A P2A O4A P2A O6A  
BOND O6A CCP CCP H121 CCP H122  
BOND P1A O1A P1A O2A P1A O5B  
BOND O5B C5B C5B C4B C4B O4B C4B C3B O4B C1B  
BOND C1B N9A C1B C2B N9A C4A N9A C8A C4A N3A  
BOND C2A N1A C6A N6A  
BOND N6A H61A N6A H62A C6A C5A C5A N7A  
BOND C2A N1A C6A N6A  
BOND N6A H61A N6A H62A C6A C5A C5A N7A

BOND C2B C3B C2B O2B O2B HO2A C3B O3B  
BOND C1B H1B C2B H2B C3B H3B C4B H4B C5B H51A  
BOND C5B H52A C8A H8A C2A H2A  
DOUBLE N1A C6A C2A N3A C4A C5A N7A C8A  
BOND O3B P3B P3B O7A P3B O8A P3B O9A  
IMPR C1 S1P C2 O2  
IMPR N4P C5P C3P HN4  
IMPR C5P C6P N4P O5P  
IMPR N8P C9P C7P HN8  
IMPR C9P CAP N8P O9P  
IMPR N6A H61A H62A C6A  
IMPR C6A C5A N1A N6A

END  
RETURN

## Palmitoyl-CoA, Caprylic-CoA and Behenic-CoA parameters

read param card flex append

\*

### BONDS

S C 198.00 1.8180 ! Aleksandrov & Field (AAMF), Phys Chem Chem Phys 2011  
CG321 CT1 222.50 1.5380 ! from CHARMM36 prot - modified from CT2 to CG321 (CH2 aliphatic carbon)

### ANGLES

CT2 S C 34.00 95.00 ! AAMF  
S C O 80.00 121.00 ! AAMF  
C CT1 OH1 50.00 110.50 ! AAMF  
CT1 CG321 OG303 75.70 110.10 ! from CHARMM36 cgenff - modified from CG311 to CT1 (both CH carbon)  
CG321 CT1 CT1 53.35 111.00 8.00 2.5610 ! from CHARMM36 prot - modified from CT2 to CG321  
CT3 CT1 CG321 53.35 114.00 8.00 2.5610 ! from CHARMM36 prot - modified from CT2 to CG321  
HGA2 CG321 CT1 26.50 110.10 22.53 2.1790 ! from CHARMM36 prot - modified from CT2 to CG321 and HA2 to HGA2  
S C CT2 50.00 114.00 ! AAMF - modified from CT3 to CT2

### DIHEDRALS

C S CT2 HA2 0.00 3 0.0 ! AAMF - modified from HA to HA2  
HA2 CT2 C S 0.04 3 0.0 ! AAMF - modified from CT3 to CT2, HA to HA2  
CT2 CT2 C S 0.24 1 180.0 ! based on AAMF  
CT2 CT2 C S 0.37 3 0.0 ! based on AAMF  
C S CT2 CT2 0.24 1 180.0 ! AAMF  
C S CT2 CT2 0.37 3 0.0 ! AAMF  
O C S CT2 3.73 1 180.0 ! AAMF  
O C S CT2 2.07 2 180.0 ! AAMF  
CT2 C S CT2 2.63 1 180.0 ! AAMF - modified from CT3 to CT2  
CT2 C S CT2 2.56 2 180.0 ! AAMF - modified from CT3 to CT2  
NH1 C CT2 CT2 2.98 1 0.0 ! AAMF  
CT2 CT2 NH1 C 1.44 1 180.0 ! AAMF  
CT2 CT2 NH1 C 0.30 3 180.0 ! AAMF  
NH1 C CT1 OH1 0.00 3 0.0 ! AAMF  
O C CT1 OH1 0.00 3 0.0 ! AAMF  
NH1 C CT1 HA1 0.00 3 0.0 ! AAMF - modified from HA to HA1  
O C CT1 HA1 0.00 3 0.0 ! AAMF - modified from HA to HA1  
CT1 CT1 CG321 OG303 0.20 3 180.0 ! from CHARMM36 cgenff - modified from CG311 to CT1  
CT1 CT1 CG321 HGA2 0.195 3 0.00 ! from CHARMM36 prot - modified from CT2 to CG321 and HA2 to HGA2  
CT1 CG321 OG303 PG1 0.60 1 180.0 ! from CHARMM36 cgenff - modified from CG311 to CT1  
CT1 CG321 OG303 PG1 0.65 2 0.00 ! from CHARMM36 cgenff - modified from CG311 to CT1  
CT1 CG321 OG303 PG1 0.05 3 0.00 ! from CHARMM36 cgenff - modified from CG311 to CT1  
CT3 CT1 CG321 OG303 0.20 3 180.0 ! from CHARMM36 cgenff - modified from CG311 to CT1 and CG331 to CT3  
CT3 CT1 CG321 HGA2 0.195 1 0.00 ! from CHARMM36 prot - modified from CT2 to CG321 and HA2 to HGA2

END

RETURN
